# Supplementary material for: Changes in Apparent Diffusion Coefficient (ADC) in Serial Weekly MRI during Radiotherapy in Patients with Head and Neck Cancer: Results from the PREDICT-HN Study
Source: MDPI journal article supplement (doi:10.3390/curroncol29090495), 2022-08-31
Supplement: s1 [file s1]

# Supplementary Materials: Baseline Splenic Volume Outweighs Immuno-modulated Size Changes with Regard to Survival Outcome in Patients with Hepatocellular Carcinoma under Immunotherapy

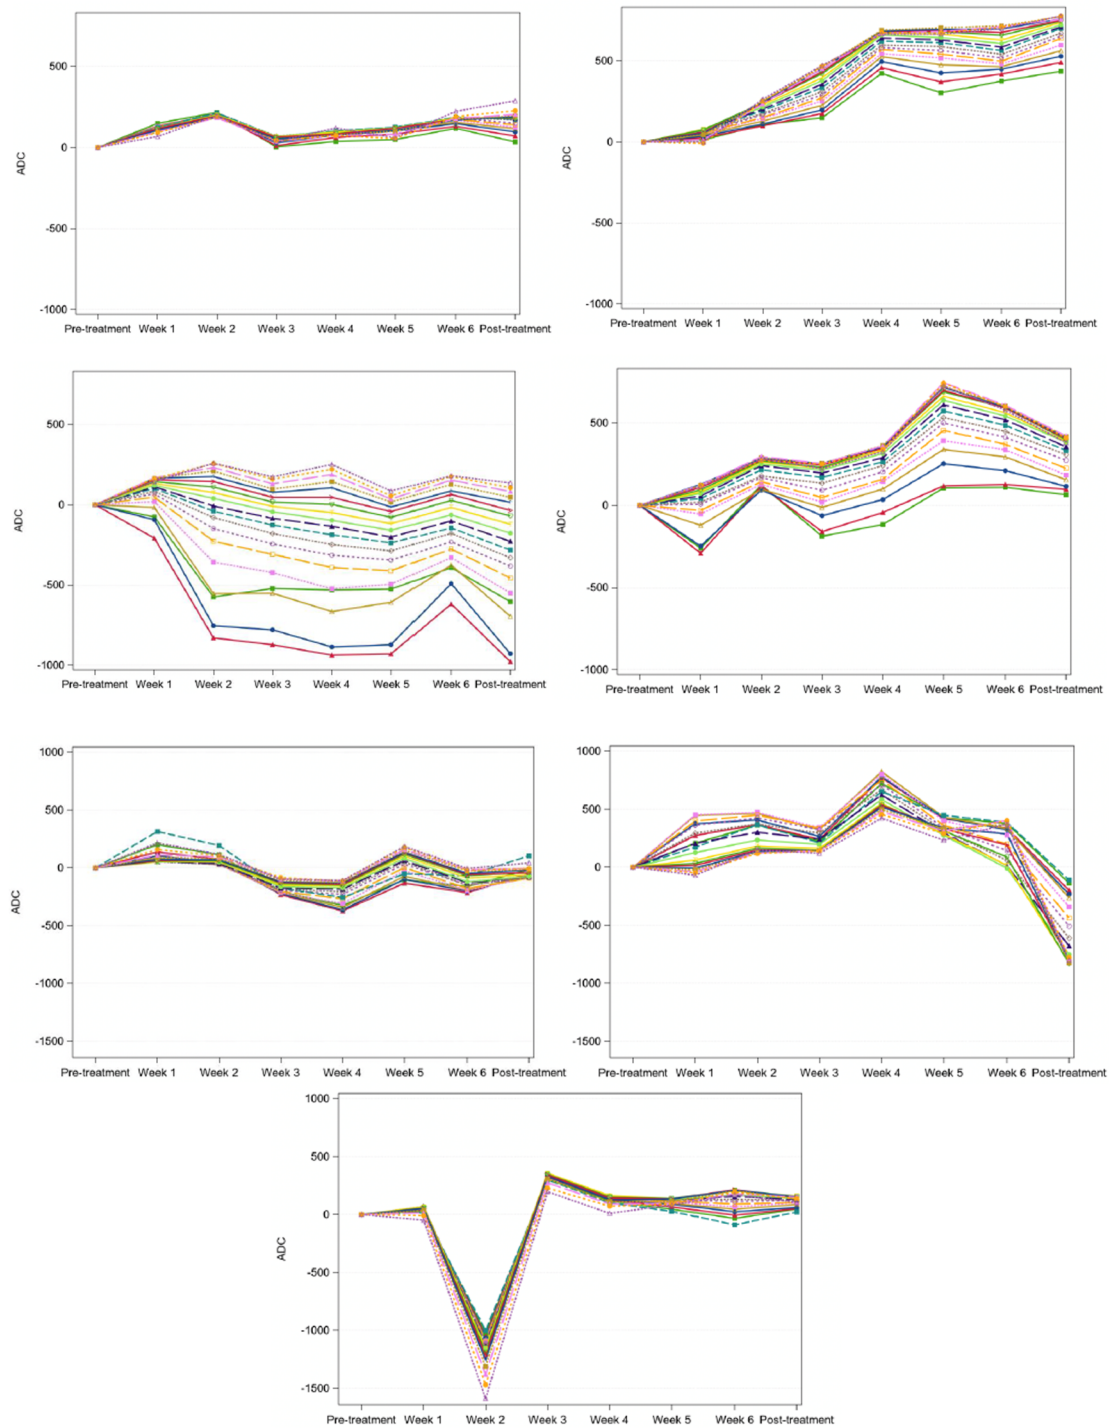

**Figure S1.** Apparent diffusion coefficient (ADC) kinetics of those who had local and regional recurrences.

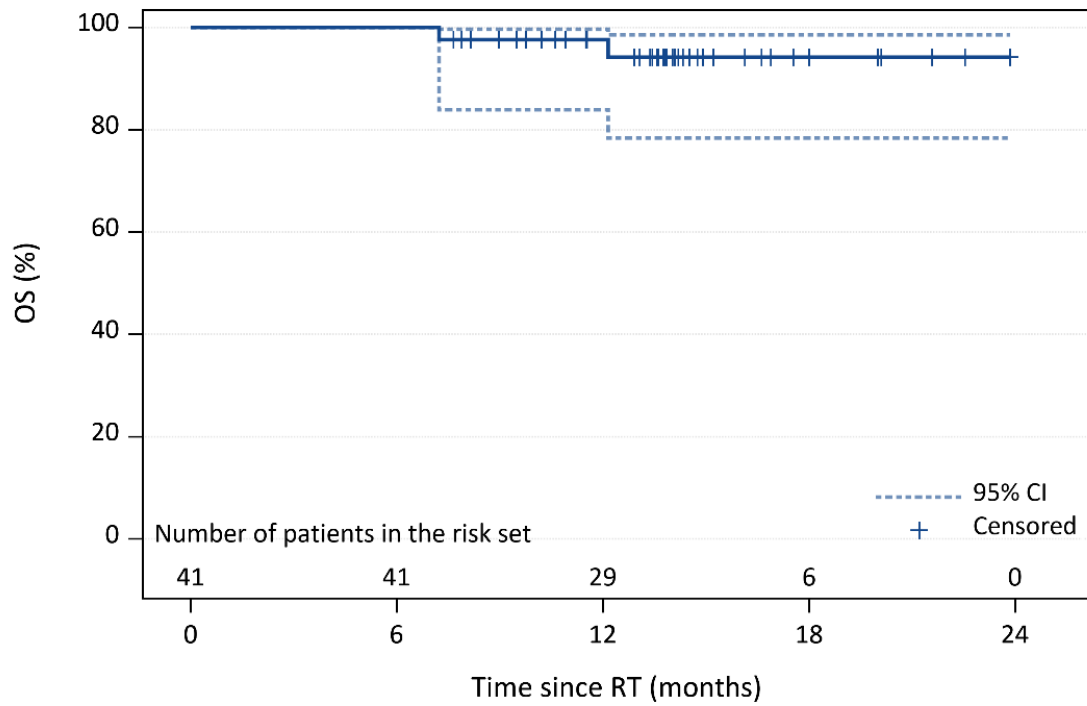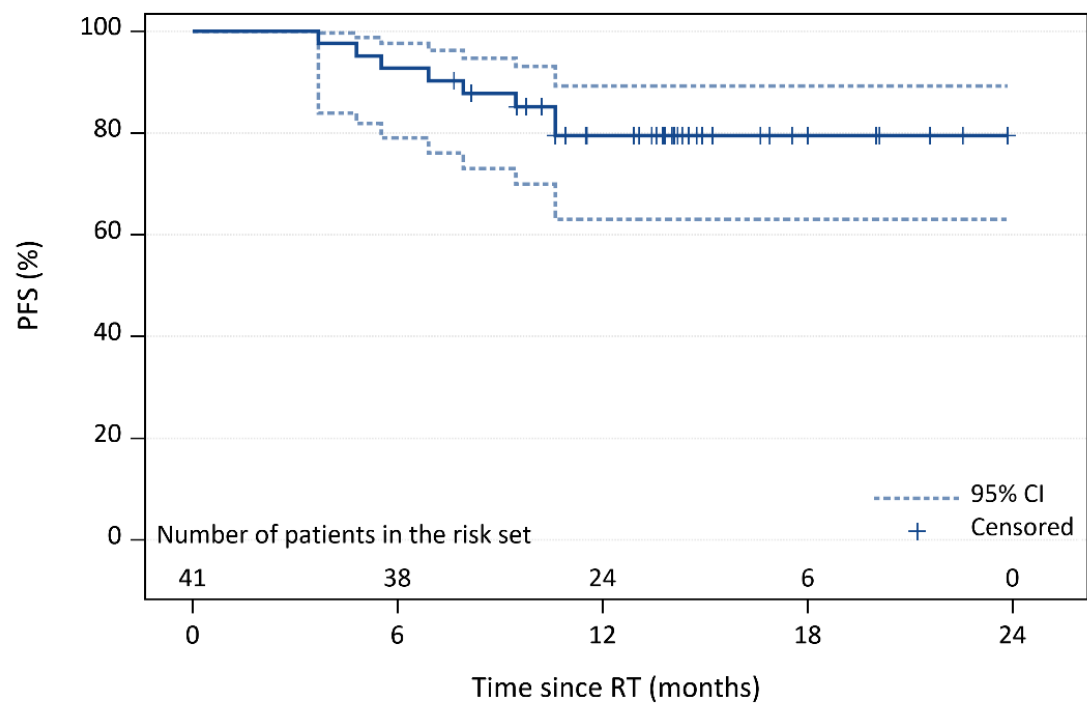

**Figure S2.** Overall survival (OS) and progression free survival (PFS) curves for the cohort with 95% confidence interval (95% CI)
